# Supplementary material for: Novel 1,3,5-triazine-based pyrazole derivatives as potential antitumor agents and EFGR kinase inhibitors: synthesis, cytotoxicity, DNA binding, molecular docking and DFT studies
Source: Royal Society of Chemistry journal article supplement (doi:10.1039/d1nj02419a), 2021-01-01
Supplement: d1nj02419a1.pdf [file d1nj02419a1.pdf]

**Novel 1,3,5-triazine based pyrazole derivatives as potential antitumor agents and EFGR kinase inhibitors: Synthesis, cytotoxicity, DNA binding, molecular docking and DFT studies**

M. S. Raghu,<sup>a</sup> C. B. Pradeep Kumar,<sup>b</sup> M. K. Prashanth,<sup>c</sup> K. Yogesh Kumar,<sup>d</sup> B. S. Prathibha,<sup>c</sup> G. Kanthimathi,<sup>e</sup> Siham Abdulrahman Alissa,<sup>f</sup> Hanan Abdulrahman Alghulikah,<sup>f</sup> Sameh M. Osman,<sup>g</sup>

<sup>a</sup>*Department of Chemistry, New Horizon College of Engineering, Bengaluru 560 103, India*

<sup>b</sup>*Department of Chemistry, Malnad College of Engineering, Hassan 573 202, India*

<sup>c</sup>*Department of Chemistry, B N M Institute of Technology, Bengaluru 560 070, India*

<sup>d</sup>*Department of Chemistry, School of Engineering and Technology, Jain University, Ramanagara, 562 112, India*

<sup>e</sup>*Department of Chemistry, Ramco Institute of Technology, Rajapalayam, Tamilnadu, 626117, India*

<sup>f</sup>*Department of Chemistry, College of Science, Princess Nourahbint Abdulrahman University, Riyadh 11671, Saudi Arabia*

<sup>g</sup>*Department of Chemistry, College of Science, King Saud University, Riyadh, 11451, Saudi Arabia*

---

\*Corresponding author e-mail address: [prashanthmk87@gmail.com](mailto:prashanthmk87@gmail.com)

**Supporting information**

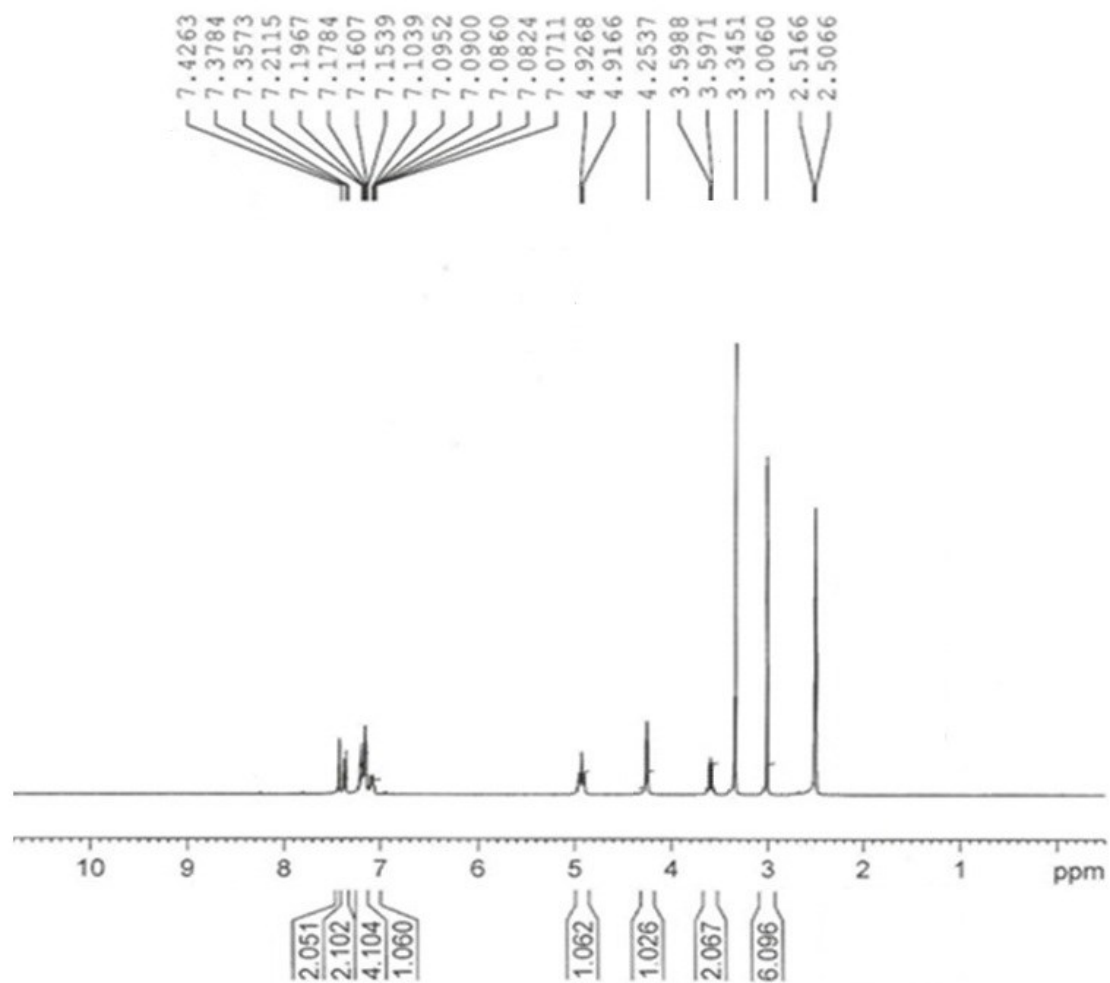

**Figure S1:**  $^1\text{H}$  NMR spectrum 6-chloro- $\text{N}^2,\text{N}^2$ -dimethyl- $\text{N}^4$ -(1-phenyl-5-(4-(trifluoromethyl)phenyl)-4,5-dihydro-1H-pyrazol-3-yl)-1,3,5-triazine-2,4-diamine (5a).

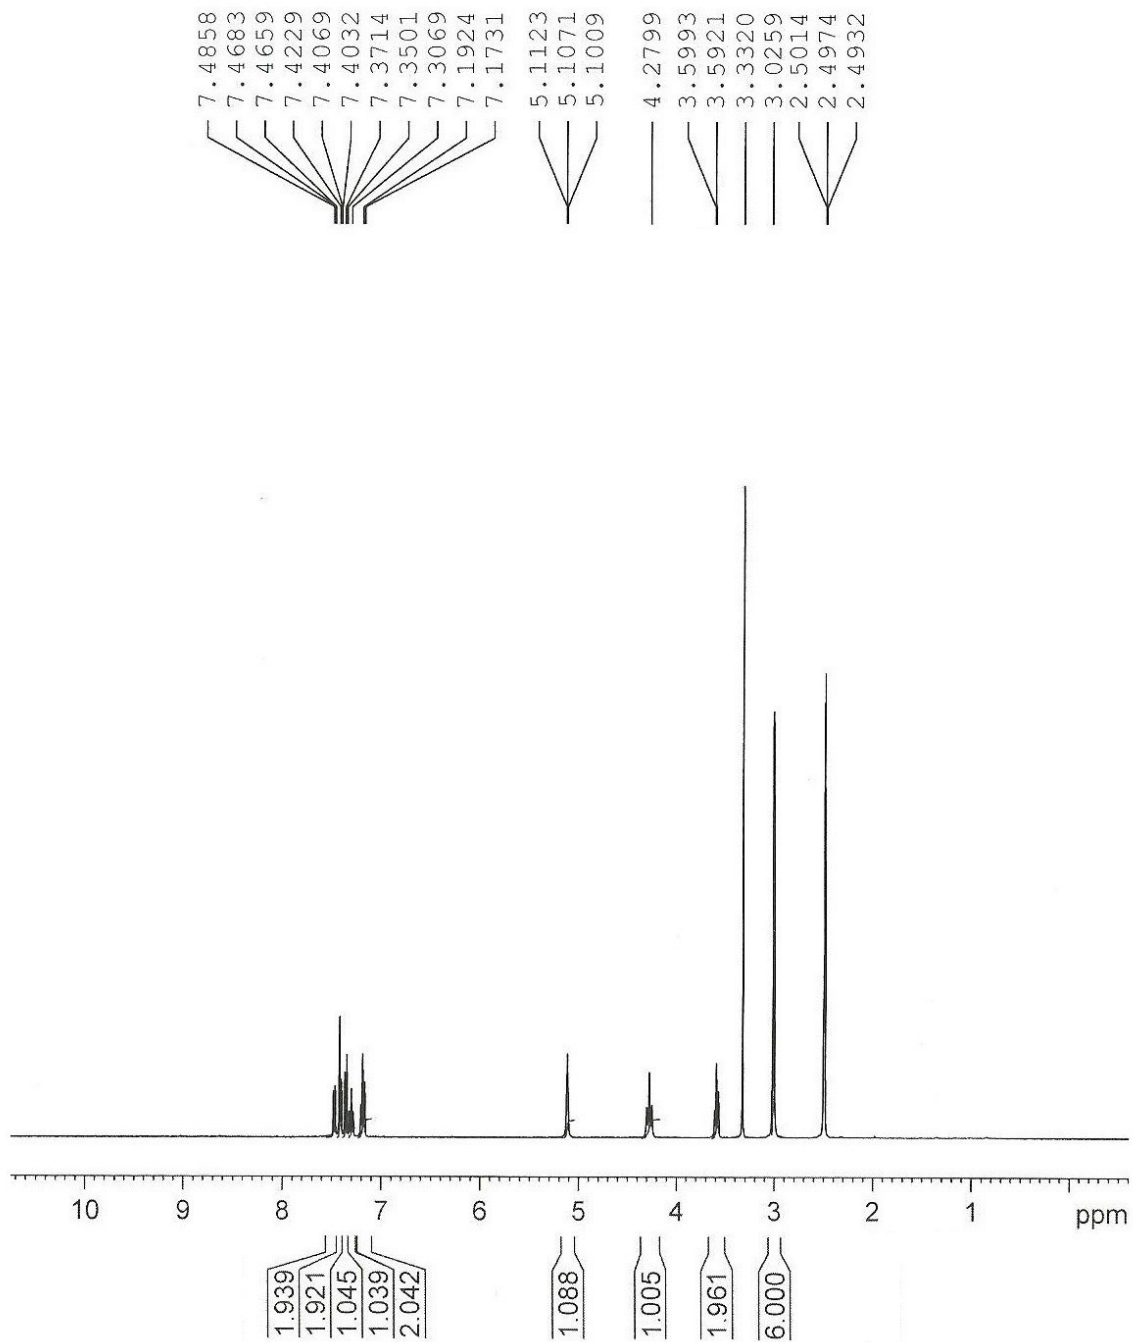

**Figure S2:**  $^1\text{H}$  NMR spectrum of  $\text{N}^2$ -(1,5-bis(4-(trifluoromethyl)phenyl)-4,5-dihydro-1H-pyrazol-3-yl)-6-chloro- $\text{N}^4, \text{N}^4$ -dimethyl-1,3,5-triazine-2,4-diamine (5h).

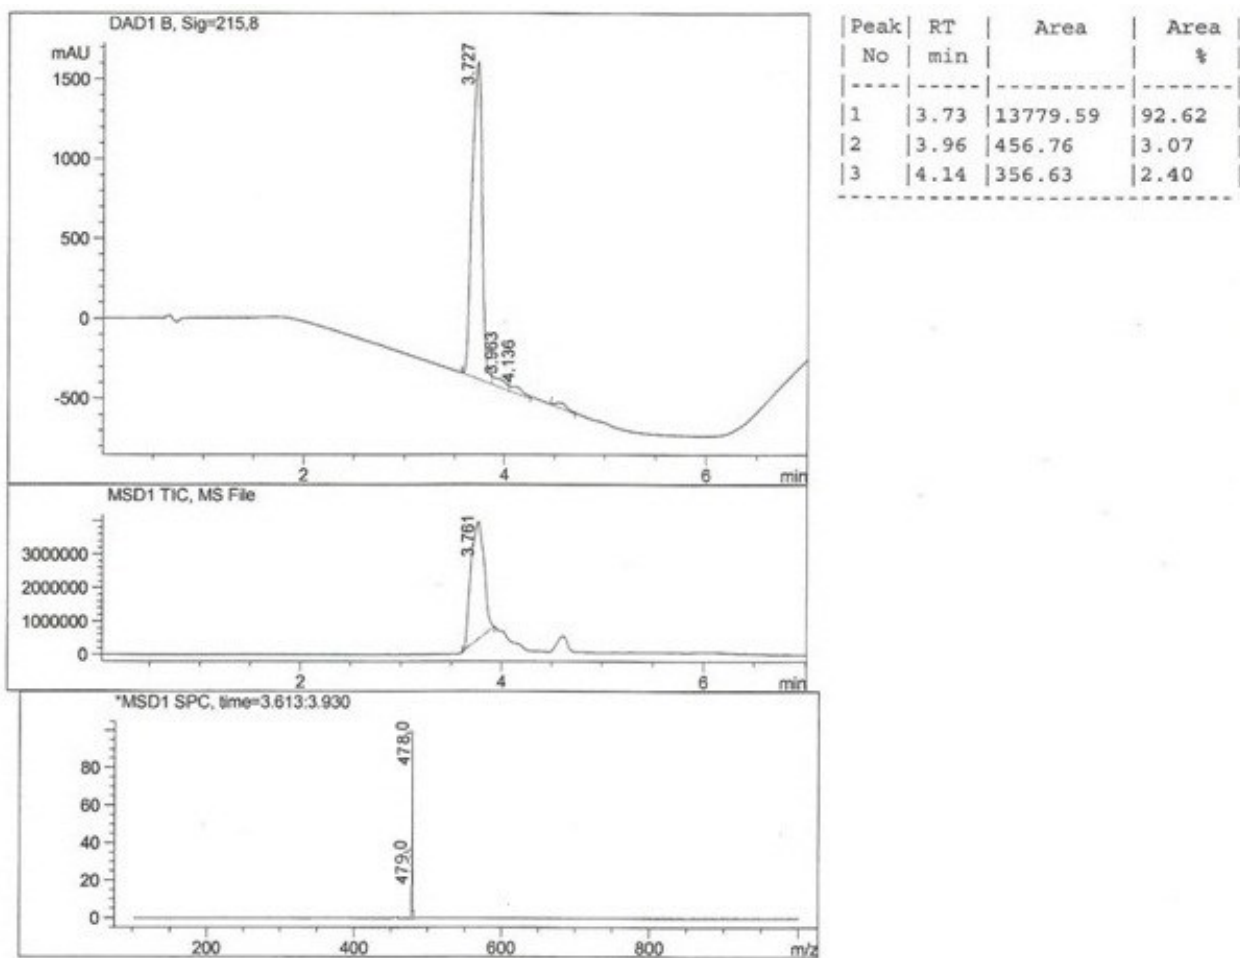

**Figure S3:** Mass spectrum of 4-(3-((4-chloro-6-(dimethylamino)-1,3,5-triazin-2-yl)amino)-5-(4-(trifluoromethyl) phenyl)-4,5-dihydro-1H-pyrazol-1-yl)phenol (5b).

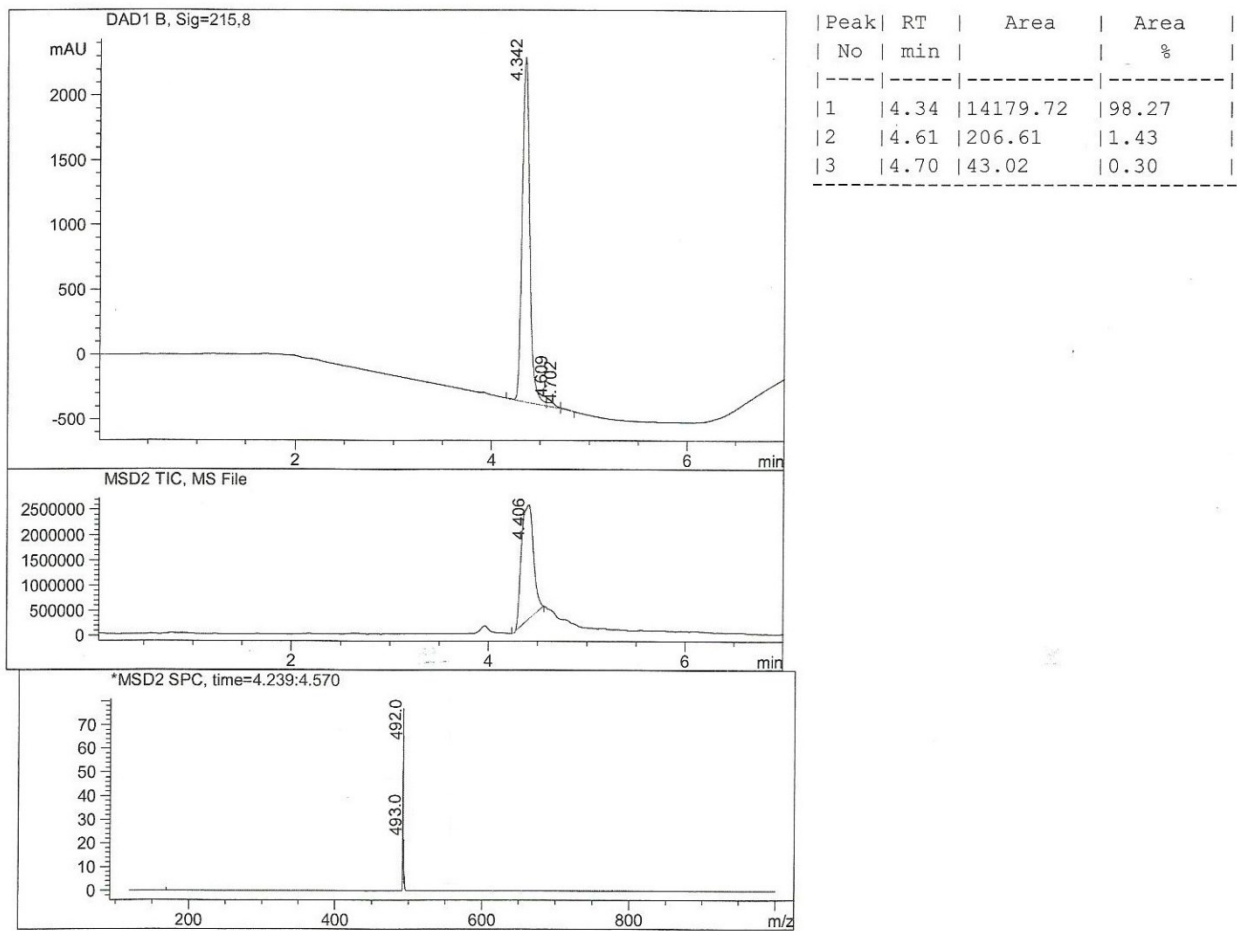

**Figure S4:** Mass spectrum of 6-chloro- $N^2$ -(1-(4-methoxyphenyl)-5-(4-(trifluoromethyl)phenyl)-4,5-dihydro-1H-pyrazol-3-yl)- $N^4,N^4$ -dimethyl-1,3,5-triazine-2,4-diamine (5d).

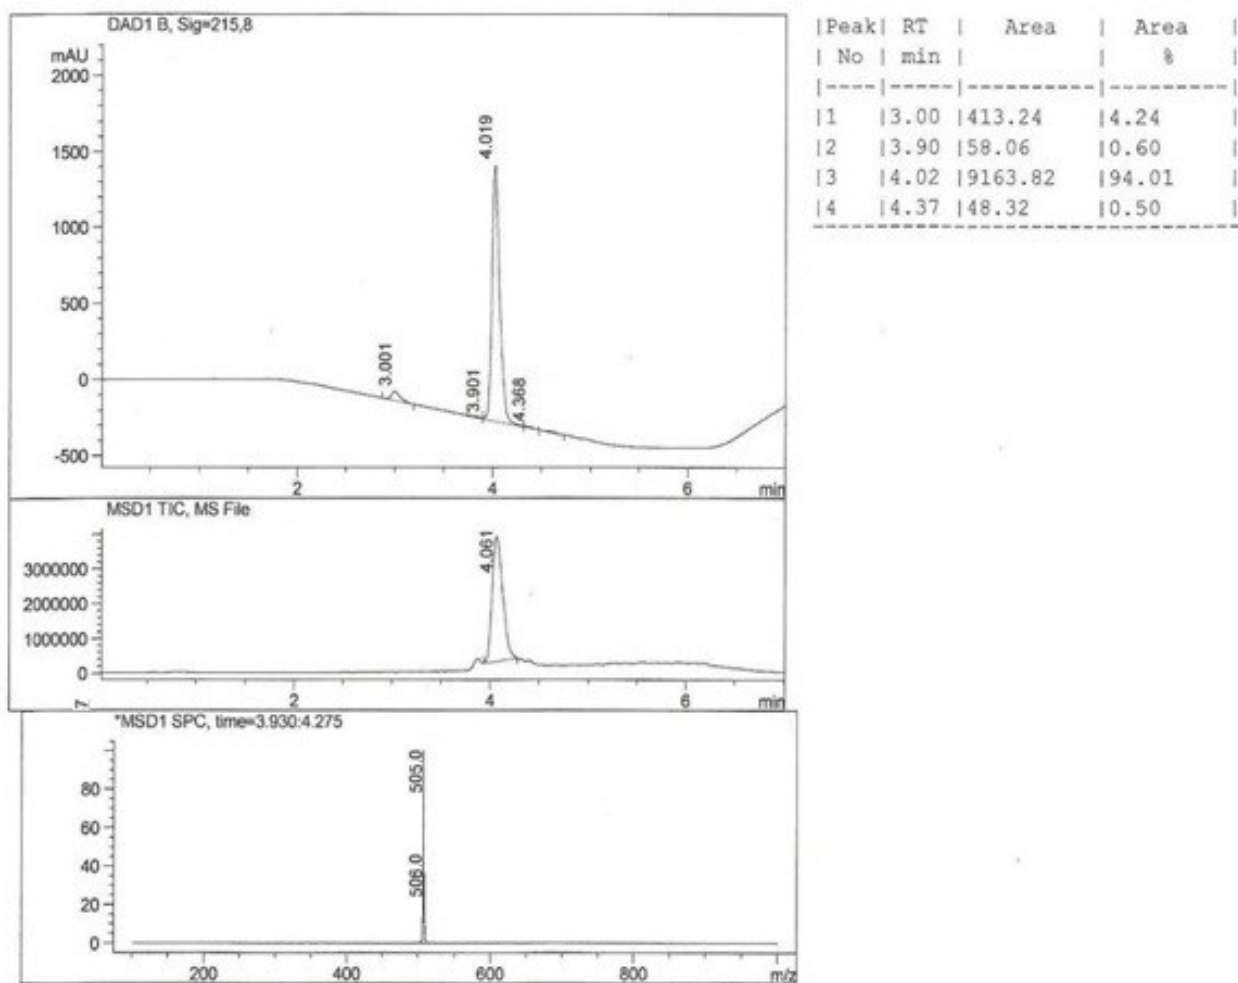

**Figure S5:** Mass spectrum of 6-chloro-N<sup>2</sup>-(1-(4-(dimethylamino)phenyl)-5-(4-(trifluoromethyl)phenyl)-4,5-dihydro-1H-pyrazol-3-yl)-N<sup>4</sup>,N<sup>4</sup>-dimethyl-1,3,5-triazine-2,4-diamine (5i).
